# Supplementary material
Source: MDPI journal article supplement (https://www.mdpi.com/2073-4344/8/7/270)
Supplement: s1 [file s1]

# Supplementary Material: Oxidative Dehydrogenation of Liquefied Petroleum Gas on Copper, Zinc and Iron Oxide Impregnated on MFI Zeolite Assisted by Electric Power

Amin Alamdari and Ramin Karimzadeh \*

Department of Chemical Engineering, Tarbiat Modares University (TMU), Jalal Al Ahmad Highway, P.O. Box, Tehran, 14115-4838, Iran; amin.alamdari@modares.ac.ir

\* Correspondence: ramin@modares.ac.ir; Tel.: +98-21-8288-3315

Received: 26 May 2018; Accepted: 22 June 2018; Published: date

## Figures

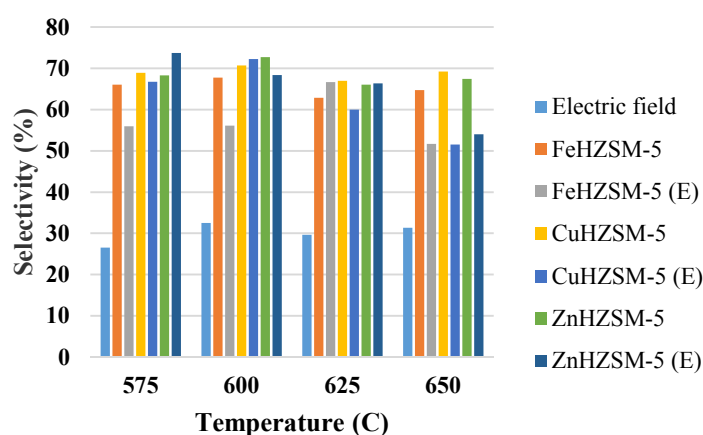

**Figure S1.** Effect of temperature in oxidative dehydrogenation of LPG for 4%wt. FeHZSM-5, 4%wt. CuHZSM-5 and 4%wt. ZnHZSM-5 catalysts on selectivity in presence and absence of electric field: 100 mg catalyst, 6 mA, 10 mm gap distance and 4% wt. metal loading.

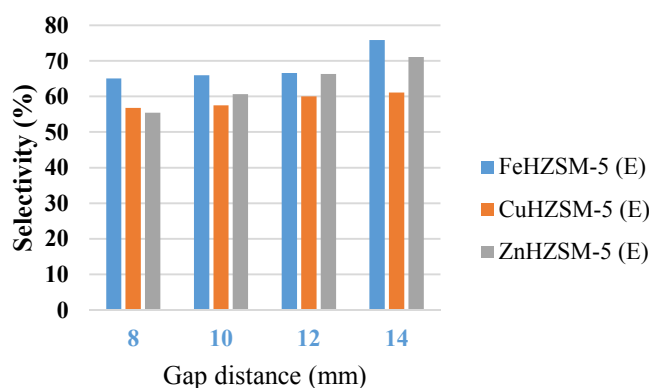

**Figure S2.** Effect of gap distance in oxidative dehydrogenation for 4%wt. FeHZSM-5, 4%wt. CuHZSM-5 and 4%wt. ZnHZSM-5 catalysts on olefin selectivity: 100 mg catalyst, 625 °C, 6 mA, and 4% wt. metal loading.

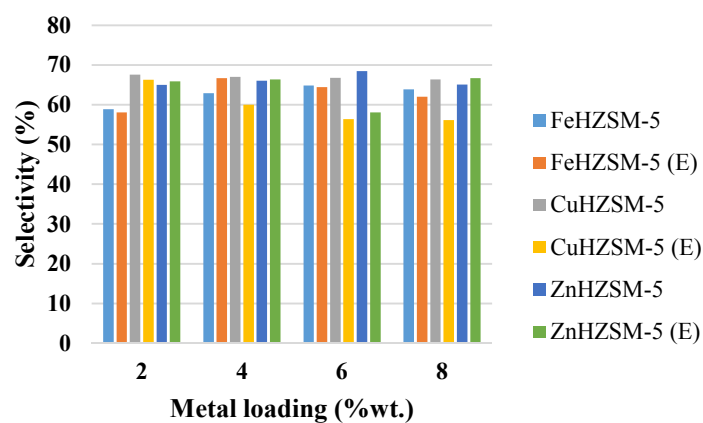

**Figure S3.** Effect of metal loading in oxidative dehydrogenation for 4%wt. FeHZSM-5, 4%wt. CuHZSM-5 and 4%wt. ZnHZSM-5 catalysts on olefin selectivity: 100 mg catalyst, 625 °C, 6 mA, and 10 mm gap distance.

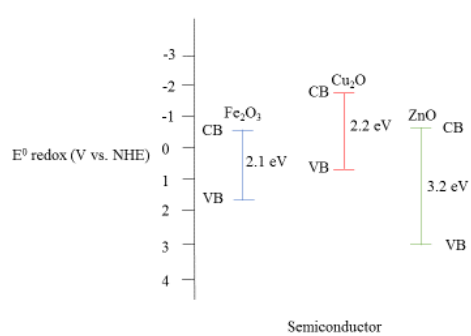

**Figure S4.** Band gap, potentials of valence and conduction bands of various semiconductor metal oxides.

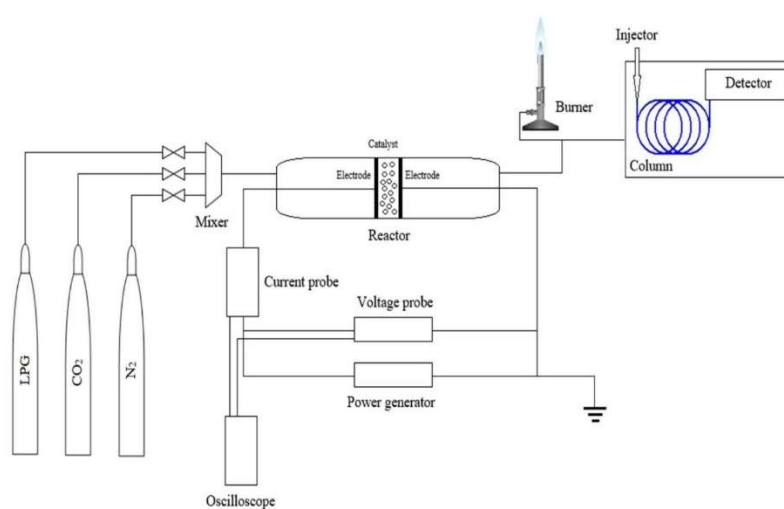

**Figure S5.** The schematic of fixed bed flow type reactor in the electric field.

© 2018 by the authors. Submitted for possible open access publication under the

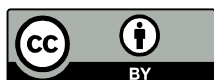

terms and conditions of the Creative Commons Attribution (CC BY) license (<http://creativecommons.org/licenses/by/4.0/>).
